# Supplementary material for: Efficient hole transport layers with widely tunable work function for deep HOMO level organic solar cells
Source: Royal Society of Chemistry journal article supplement (doi:10.1039/c5ta06878a), 2015-01-01
Supplement: c5ta06878a1.pdf [file c5ta06878a1.pdf]

## Supplementary Information

### Efficient Hole Transport Layers with Widely Tunable Work Function for Deep HOMO Level Organic Solar Cells

Jiaqi Cheng<sup>#a</sup>, Fengxian Xie<sup>#a</sup>, Yongsheng Liu<sup>b</sup>, Wei E.I. Sha<sup>a</sup>, Xinchen Li<sup>a</sup>, Yang Yang<sup>\*b</sup>, Wallace C.H. Choy<sup>\*a</sup>

<sup>a</sup> Jiaqi Cheng, Dr. Fengxian Xie, Dr. Wei E.I. Sha, Xinchen Li, Prof. Wallace C. H. Choy  
Department of Electrical and Electronic Engineering  
The University of Hong Kong  
Pokfulam Road, Hong Kong SAR, China  
E-mail: chchoy@eee.hku.hk (Choy)

<sup>b</sup> Dr. Yongsheng Liu, Prof. Yang Yang  
Department of Materials Science and Engineering  
University of California, Los Angeles  
Los Angeles, CA 90095, USA  
E-mail: yangy@ucla.edu (Yang)

a)

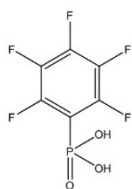

b)

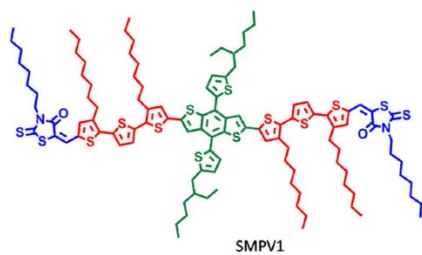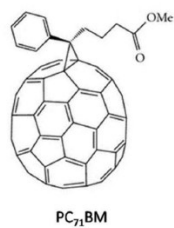

**Fig. S1.** Molecular structure of a) F5BnPA, b) SMPV1 and PC<sub>71</sub>BM.

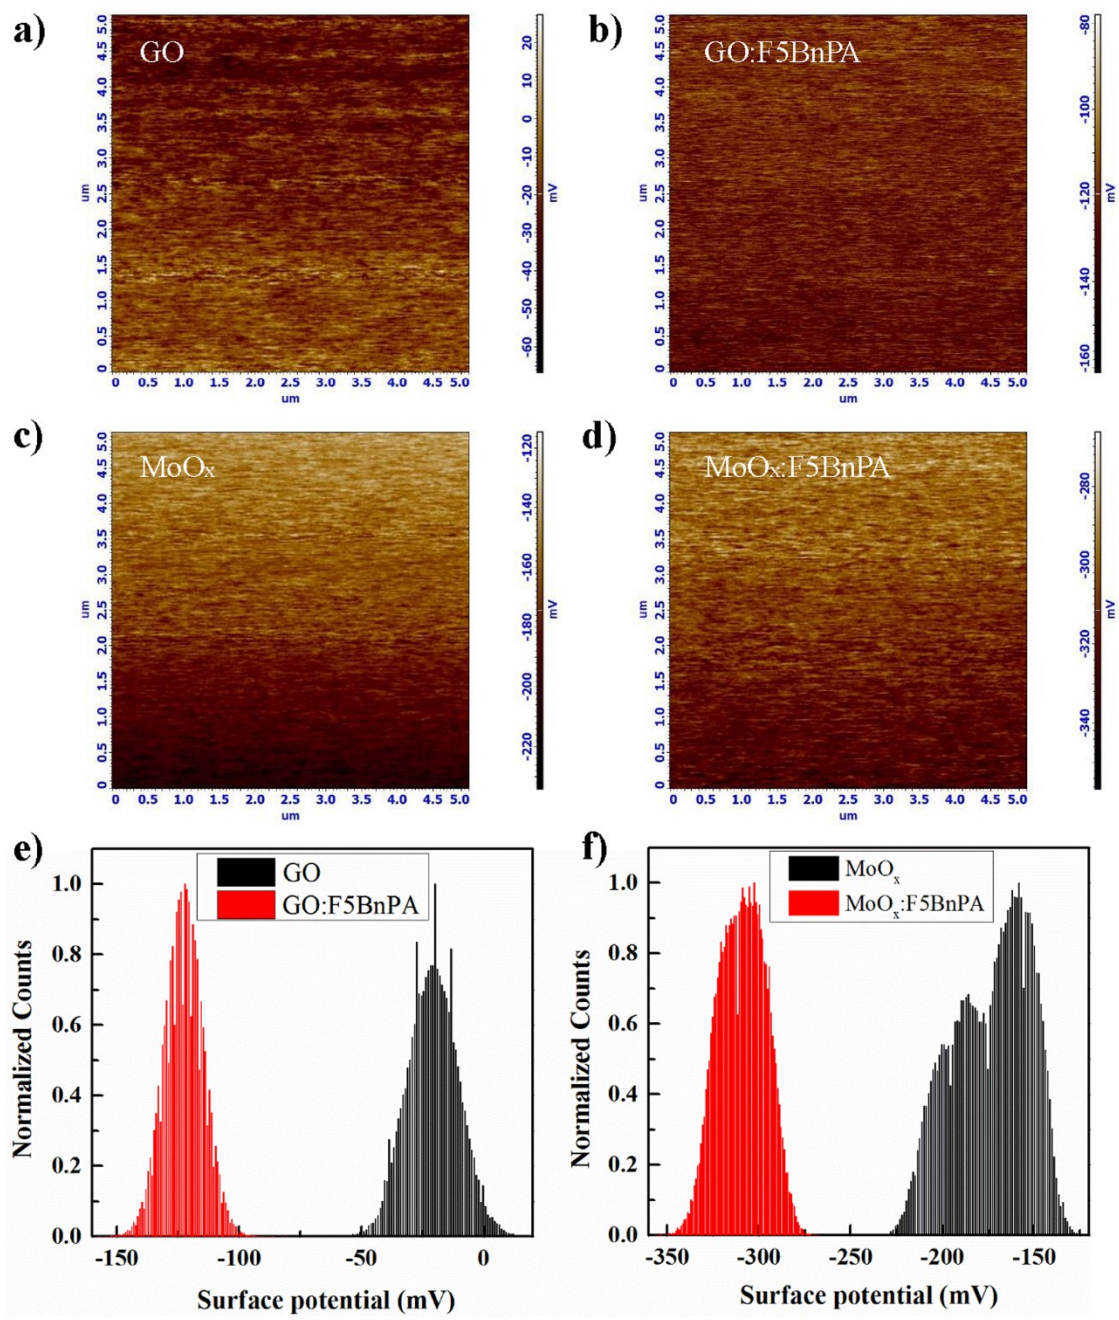

**Fig. S2** Surface potential images of a) GO, b) GO:F5BnPA, c) MoO<sub>x</sub>, d) MoO<sub>x</sub>:F5BnPA. e-f) corresponding pixel analysis.

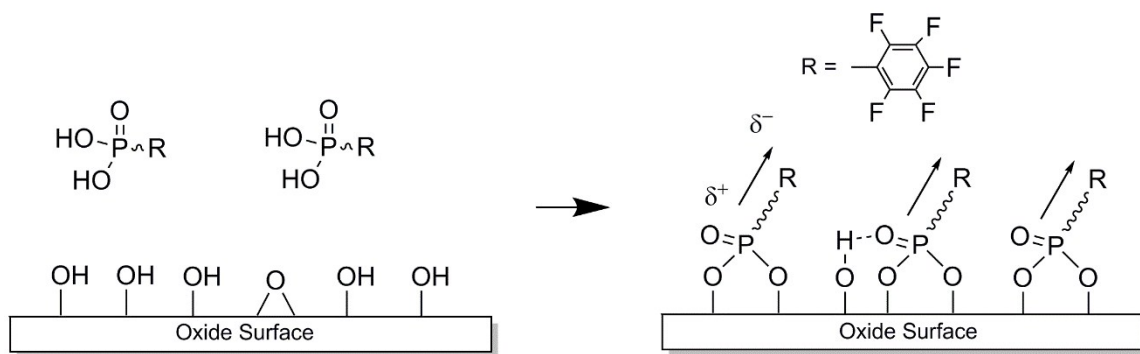

**Fig. S3** Schematic of chemisorption of F5BnPA on oxide surface and dipole moment.

The thickness of GO and MoO<sub>x</sub> are optimized through P3HT:PCBM based OSCs. The device structure is ITO/GO or MoO<sub>x</sub>/P3HT:PCBM/Ca/Al. The devices are fabricated according to the details in the experimental section. The GO solution is diluted into a series of concentration (0.8, 0.6, 0.4, 0.2, 0.1 mg mL<sup>-1</sup>). The synthesized molybdenum bronze solution is diluted by ethanol in a series of v/v ratio (1:2.5, 1:5, 1:7.5, 1:10, 1:12.5). The optimized concentration of GO solution in ethanol was 0.2 mg mL<sup>-1</sup>, and the optimized ratio of molybdenum bronze solution was 1:7.5. The respective thickness are 2 nm and 8 nm, as measured by ellipsometer.

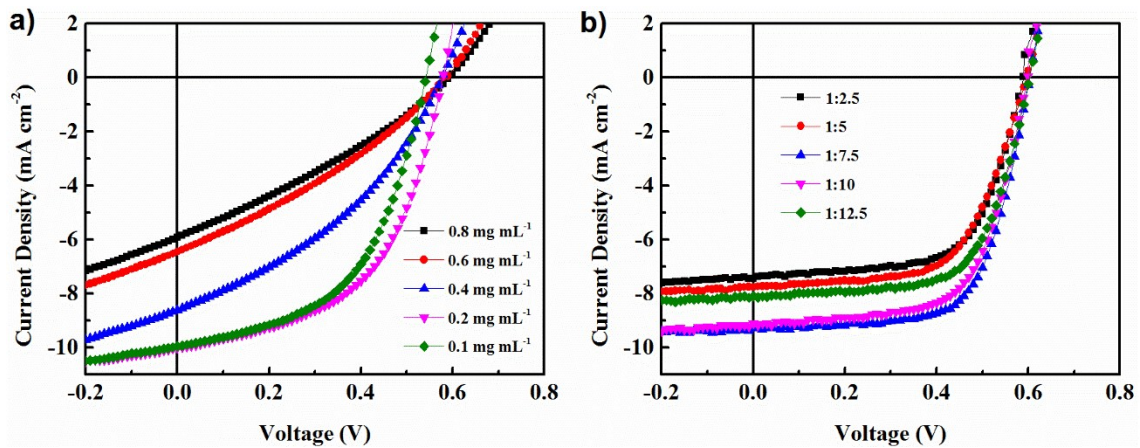

**Fig. S4.** *J-V* characteristics of P3HT:PCBM based OSCs using different thickness of a) GO and b) MoO<sub>x</sub>.

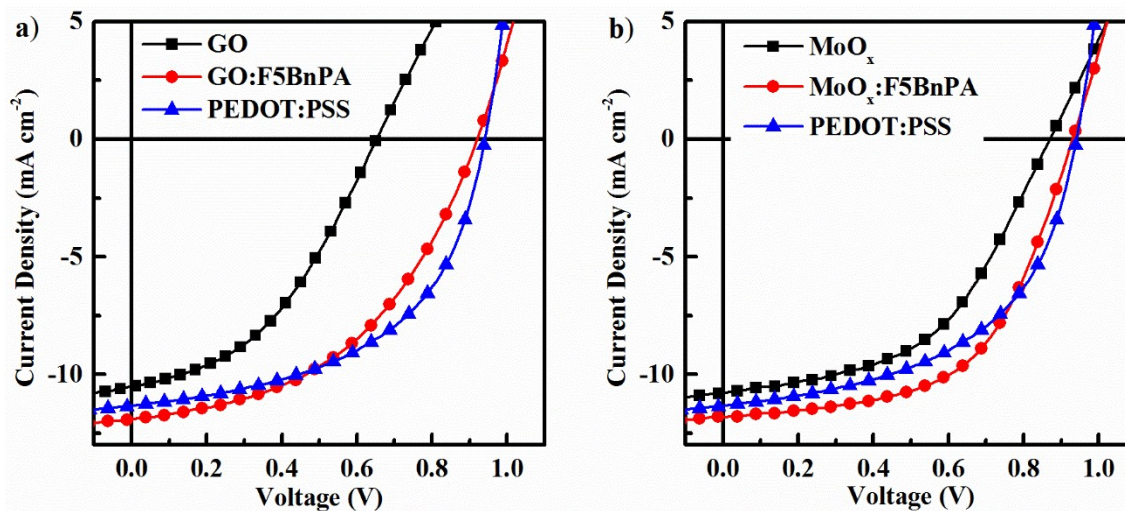

**Fig. S5.**  $J$ - $V$  characteristics of P3HT:PCBM based OSCs using different HTLs (the concentrations of F5BnPA are both  $0.5 \text{ mg mL}^{-1}$ ) under illumination of simulated  $100 \text{ mW cm}^{-2}$  AM 1.5G irradiation.

**Table S1.** Device performance of OSCs with the structure of ITO/HTL/SMPV1:PC<sub>71</sub>BM/Ca/Al.

|                          | $J_{sc}$ ( $\text{mA cm}^{-2}$ ) | $V_{oc}$ (V)    | FF (%)           | PCE (%)         |
|--------------------------|----------------------------------|-----------------|------------------|-----------------|
| GO                       | $11.03 \pm 0.27$                 | $0.65 \pm 0.01$ | $43.28 \pm 0.76$ | $3.10 \pm 0.14$ |
| GO:F5BnPA                | $11.96 \pm 0.11$                 | $0.92 \pm 0.01$ | $46.59 \pm 1.00$ | $5.13 \pm 0.18$ |
| MoO <sub>x</sub>         | $10.96 \pm 0.20$                 | $0.88 \pm 0.01$ | $50.81 \pm 0.30$ | $4.92 \pm 0.10$ |
| MoO <sub>x</sub> :F5BnPA | $11.69 \pm 0.27$                 | $0.91 \pm 0.01$ | $55.92 \pm 0.90$ | $5.96 \pm 0.19$ |
| PEDOT:PSS                | $11.27 \pm 0.47$                 | $0.94 \pm 0.01$ | $52.42 \pm 2.40$ | $5.54 \pm 0.30$ |

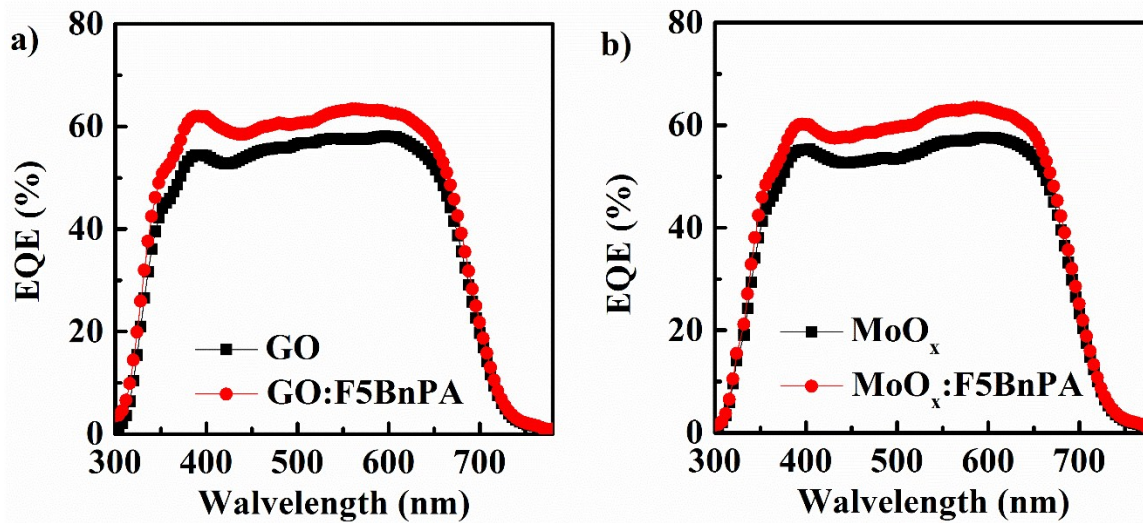

Fig. S6. EQE of the OSC structure of ITO/HTLs/Active layers/Ca/Al.

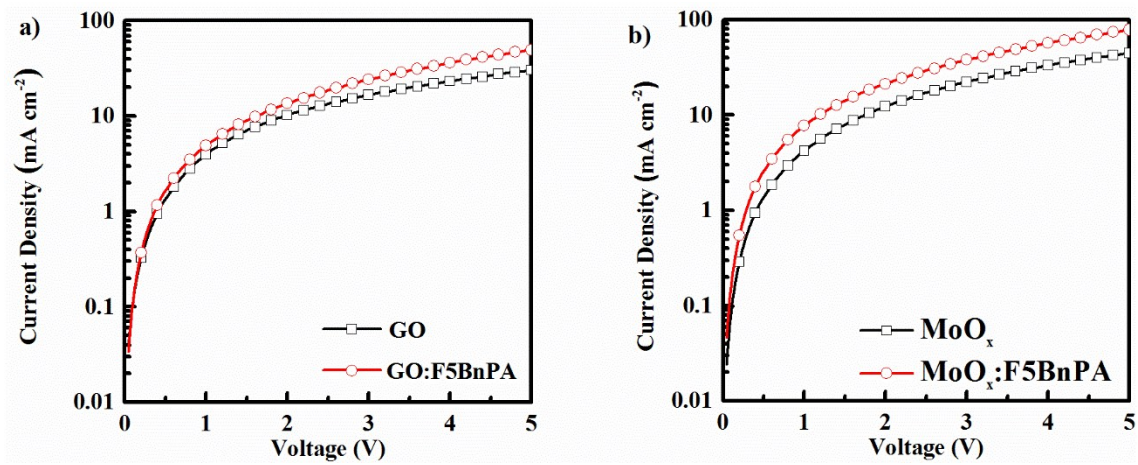

**Fig. S7.** J-V characteristics of hole only devices with the structure of ITO/HTL/SMPV1:PC<sub>71</sub>BM/MoO<sub>x</sub>/Ag.
